# Supplementary material for: Impairments of Spatial Memory and N-methyl-d-aspartate Receptors and Their Postsynaptic Signaling Molecules in the Hippocampus of Developing Rats Induced by As, Pb, and Mn Mixture Exposure
Source: MDPI journal article supplement (doi:10.3390/brainsci13121715), 2023-12-14

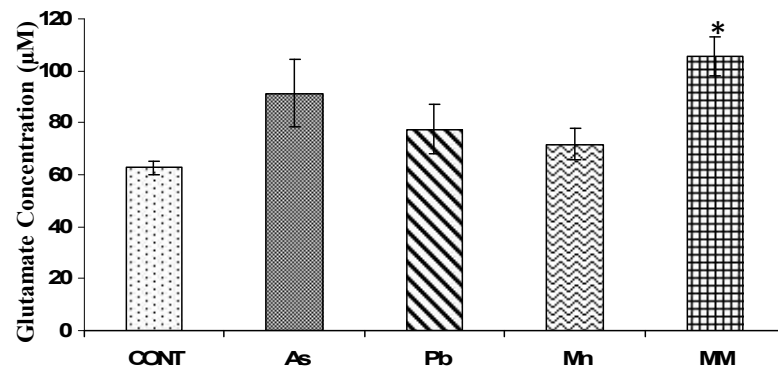

Suppl. Figure S1. Effect on glutamate concentration in hippocampus of rats following exposure (GD6-PD59) to As, Pb, Mn and their mixture on PD60. Values are the mean  $\pm$  SEM of five animals in each group of both tests. Data have been analyzed by one-way analysis of variance followed by Newman-Keuls test. Significantly different \* $p < 0.05$ , as compared to controls.

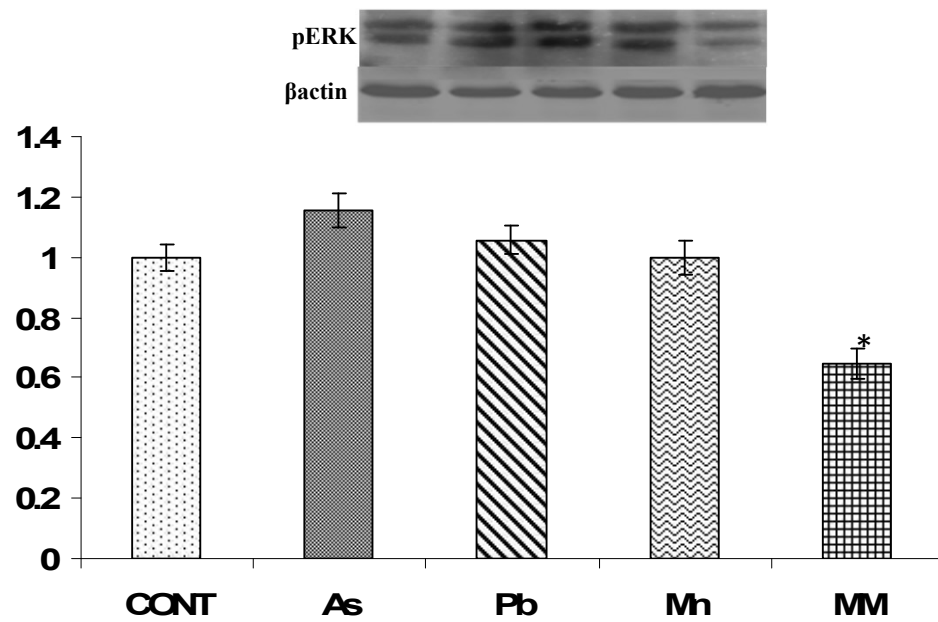

Suppl. Figure S2. Effect on expression pERK1/2 in hippocampus of rats following exposure (GD6-PD59) to As, Pb, Mn and their mixture on PD60. Values are the mean  $\pm$  SEM of three animals in each group of both tests. Data have been analyzed by one-way analysis of variance followed by Newman-Keuls test. Significantly different \* $p < 0.05$ , as compared to controls.

# Syngap

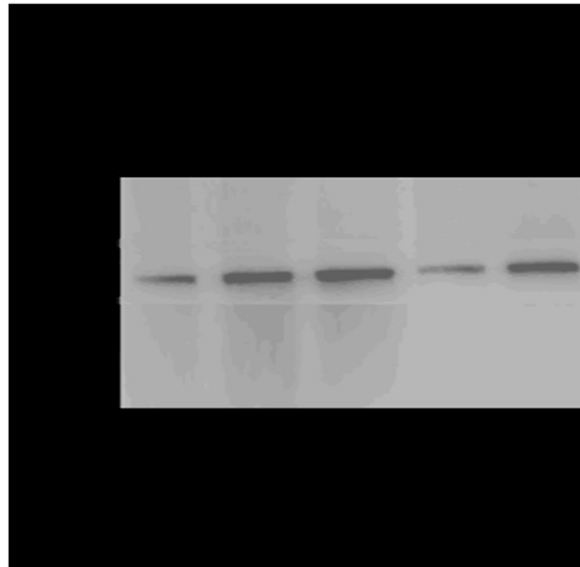

NR2A

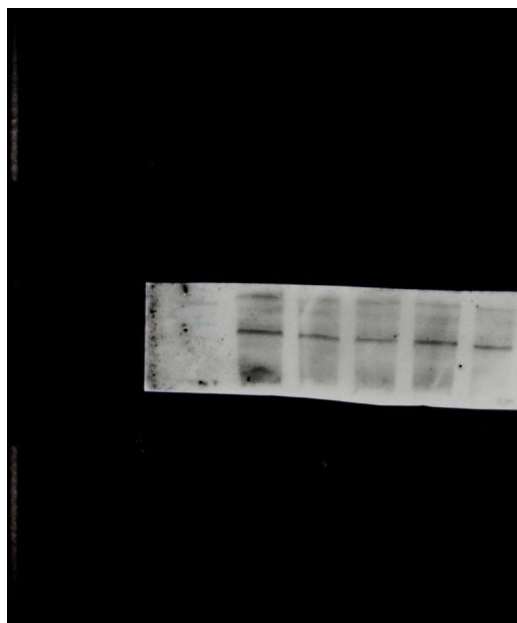

NR1

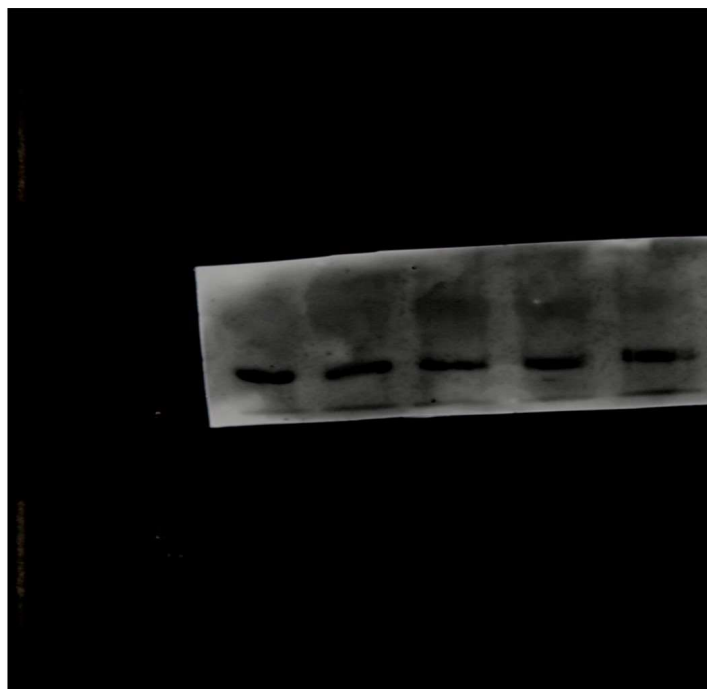

camkii

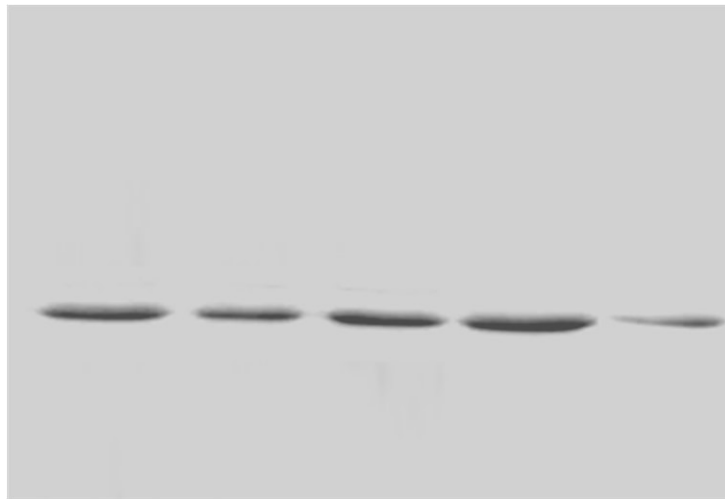

Beta actin

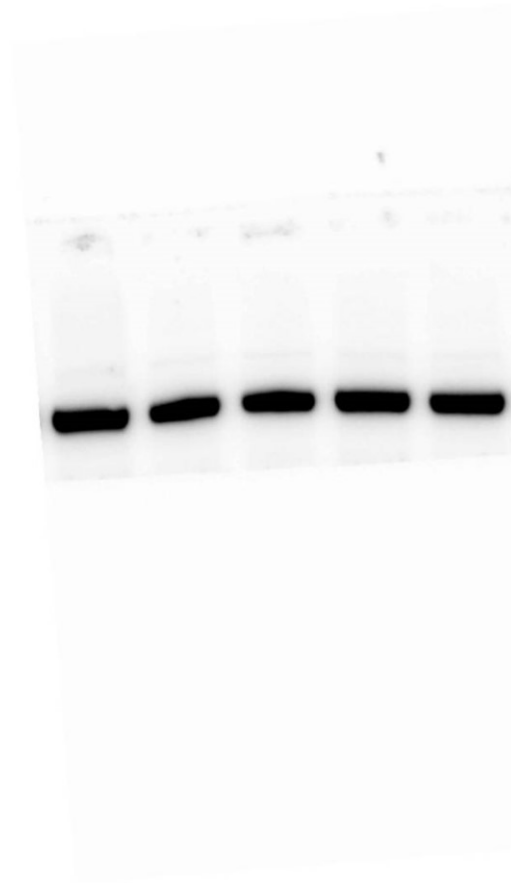

Supplement: s1 [file s1]
